# Supplementary material for: Adaptive particle patterning in the presence of active synthetic nanomotors
Source: Royal Society of Chemistry journal article supplement (doi:10.1039/d3nr00462g), 2023-01-01
Supplement: d3nr00462g1.pdf [file d3nr00462g1.pdf]

## Supporting Information

### Adaptive particle patterning in the presence of active synthetic nanomotors

Dazhi Xie <sup>a</sup>, Shaoming Fu <sup>a</sup>, Fongmei Fu <sup>a</sup>, Bin Chen <sup>b</sup>, Weidong He <sup>a</sup>, Haiying Liang <sup>b</sup>, Yingfeng Tu <sup>b</sup>, Daniela A. Wilson <sup>c</sup>, Fei Peng <sup>a\*</sup>

<sup>a</sup> *School of Materials Science and Engineering, Sun Yat-Sen University, Guangzhou 510275, China.*

<sup>b</sup> *Guangdong Provincial Key Laboratory of New Drug Screening, School of Pharmaceutical Science Southern Medical University, Guangzhou 510515, China.*

<sup>c</sup> *Institute for Molecules and Materials, Radboud University, Nijmegen, 6525 AJ, The Netherlands.*

**Corresponding author. Email:** pengf26@mail.sysu.edu.cn

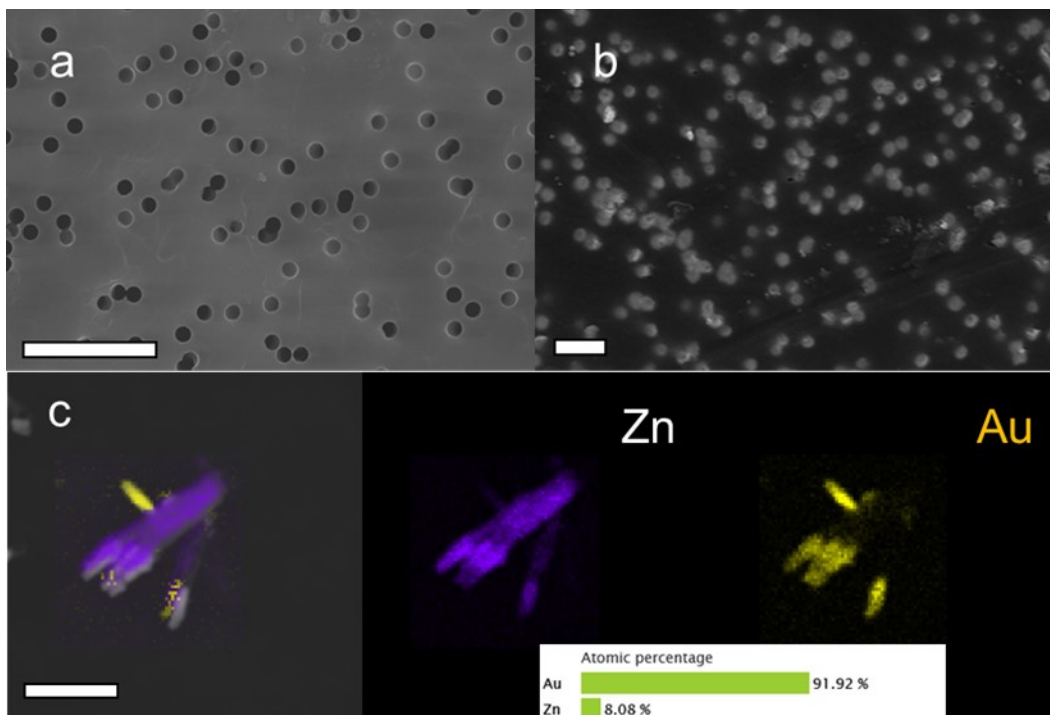

**Figure S1** (a) SEM image of the pores on the polycarbonate membrane. (b) SEM image of polycarbonate film after Au-Zn deposition. (c) SEM image and EDS image of the Au-Zn nanomotor.

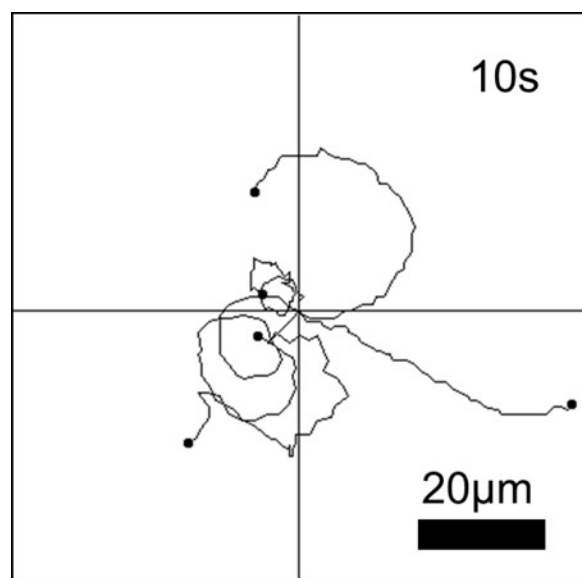

**Figure S2** The trajectory of the nanomotor propelled in DI water for 10 seconds.

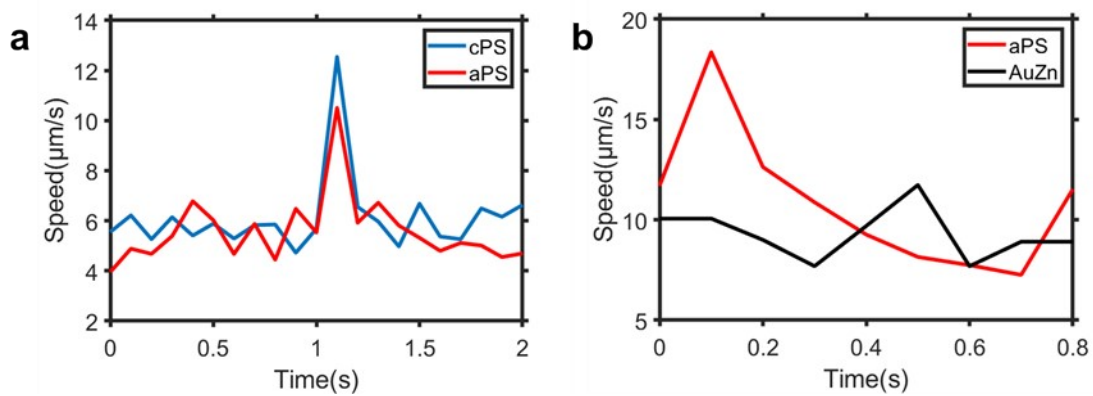

**Figure S3** (a) Speed analysis of amine PS beads and carboxyl PS beads attracted by Au-Zn nanomotors. (b) The migration speed diagram of amine PS and Au-Zn nanomotors when chasing occurs.

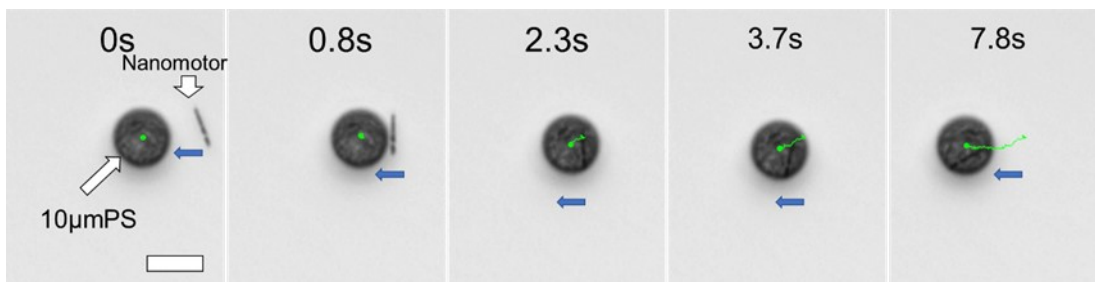

**Figure S4** The moving nanomotor combines with the 10  $\mu\text{m}$  PS beads into quasi-stable complex and move, scale bar 10  $\mu\text{m}$ .

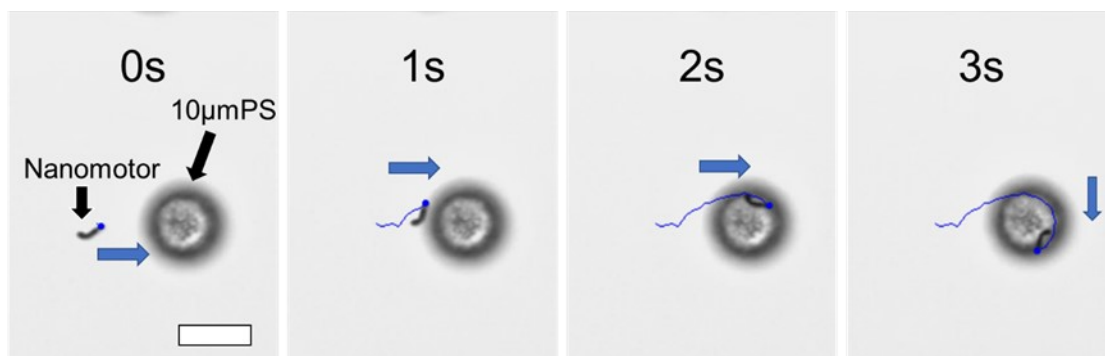

**Figure S5** The nanomotor moves in a circle along the edge of the 10  $\mu\text{m}$  PS bead, scale bar 10  $\mu\text{m}$ .

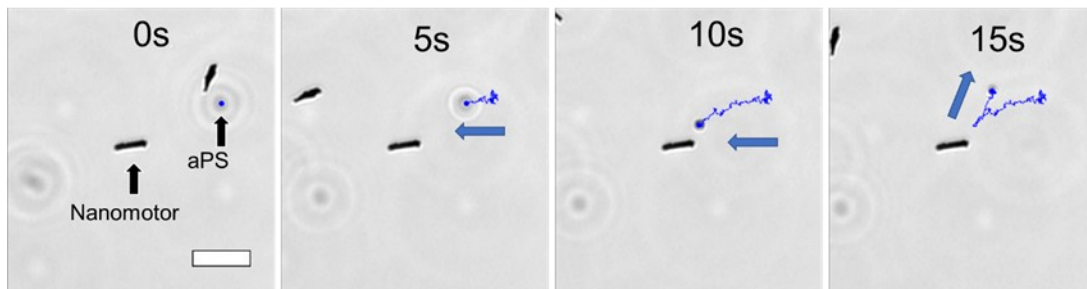

**Figure S6** Au-Zn pause on substrate. The amine PS beads from right first approached and then repulsed away from the nanomotor, scale bar 10  $\mu\text{m}$ .

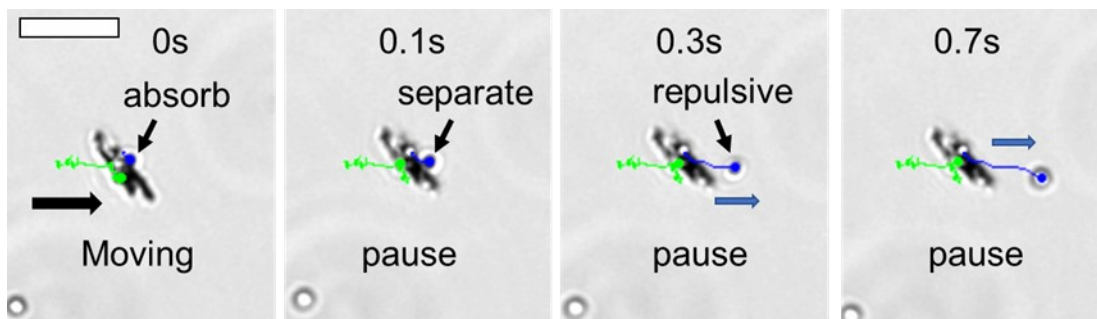

**Figure S7** The interaction mode between nanomotor and amine PS beads switched from attraction to repulsion, scale bar 10  $\mu\text{m}$ .



**Table S1** Velocity of Au-Zn nanomotor in DI water.

|                                       | Min | Max | Mean | Std Dev |
|---------------------------------------|-----|-----|------|---------|
| Velocity [ $\mu\text{m}/\text{sec}$ ] | 4.5 | 9.1 | 6.4  | 1.45    |

**Movie S1.**

Video S1, self-propulsion of Au-Zn nanomotor;

Video S2, Au-Zn nanomotor generating blue zinc ion field in presence of fluorescent probe Zinquin;

Video S3, cPS is adsorbed by the Au-Zn nanomotor;

Video S4, aPS is adsorbed by the Au-Zn nanomotor;

Video S5, aPS chasing Au-Zn nanomotor;

Video S6, Au-Zn nanomotor turn around after bound with aPS;

Video S7 Au-Zn nanomotor obtains different movement directions due to the different adsorption positions of the PS beads;

Video S8, aPS repel by Au-Zn nanomotor;

Video S9, skeleton pattern at negative substrate;

Video S10, aPS absorb by Au-Zn nanomotor at positive substrate;

Video S11, cluster pattern at positive substrate.
